# Supplementary material for: Integrins Were Involved in Soybean Agglutinin Induced Cell Apoptosis in IPEC-J2
Source: MDPI journal article supplement (doi:10.3390/ijms19020587), 2018-02-16
Supplement: s1 [file s1]

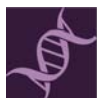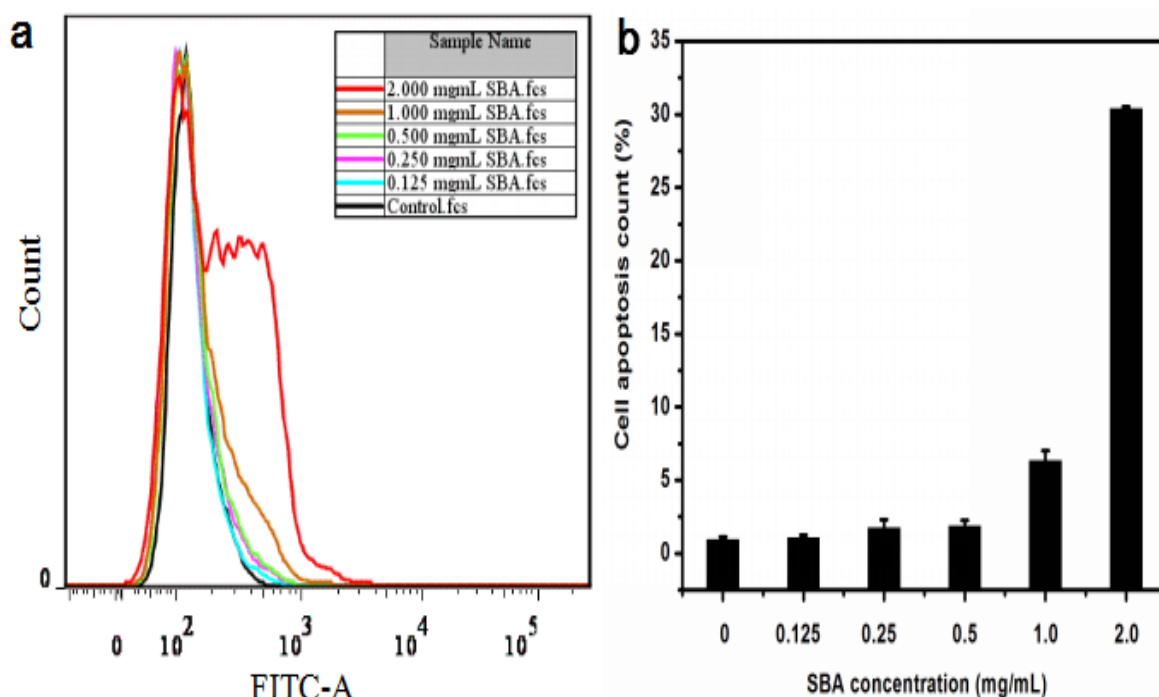

**Figure S1.** Proportions of IPEC-J2 cell apoptosis in different SBA treatments. IPEC-J2s were treated with different concentrations (0, 0.125, 0.25, 0.5, 1.0, or 2.0 mg/mL) of SBA for 24 h. (a). Curve fitting of apoptotic data in different SBA treatment; (b) Analysis of the percentage of the apoptotic cells in different treatments. Data are represented as mean  $\pm$  SEM ( $n = 3$ ).

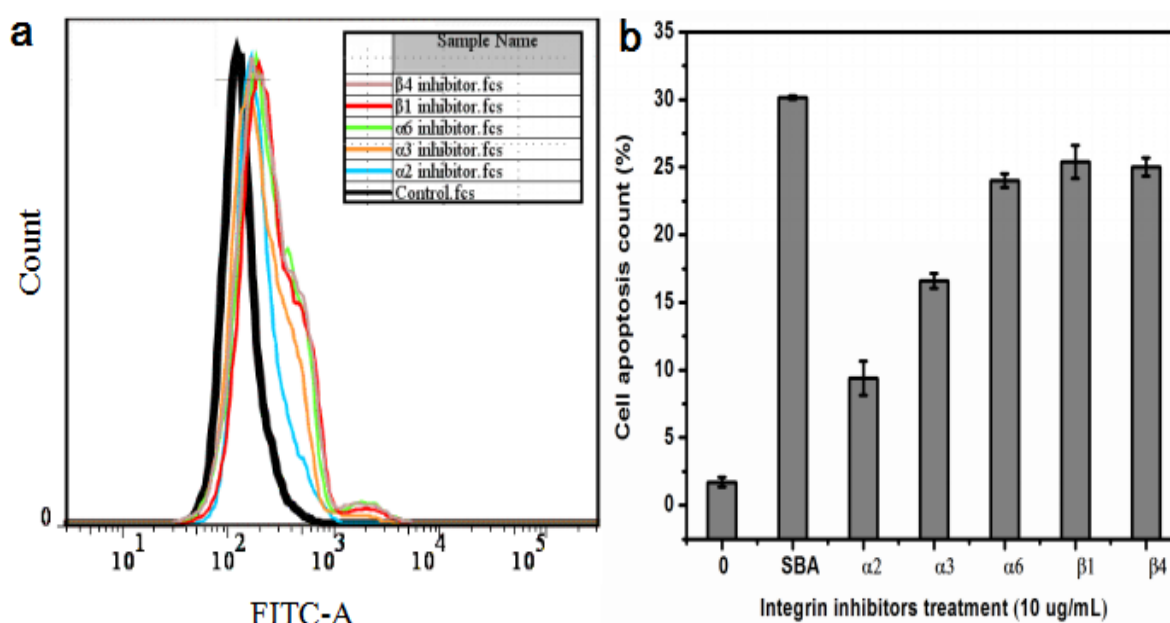

**Figure S2.** Functions of integrin inhibitors on IPEC-J2 cell apoptosis. IPEC-J2s were treated with 10  $\mu$ g/mL of different integrin ( $\alpha 2$ ,  $\alpha 3$ ,  $\alpha 6$ ,  $\beta 1$  or  $\beta 4$ ) inhibitors for 24 h. (a). Curve fitting of apoptotic data in different integrin inhibitor treatment; (b) Analysis of the percentage of the apoptotic cells in different treatments. Data are represented as mean  $\pm$  SEM ( $n = 3$ ).

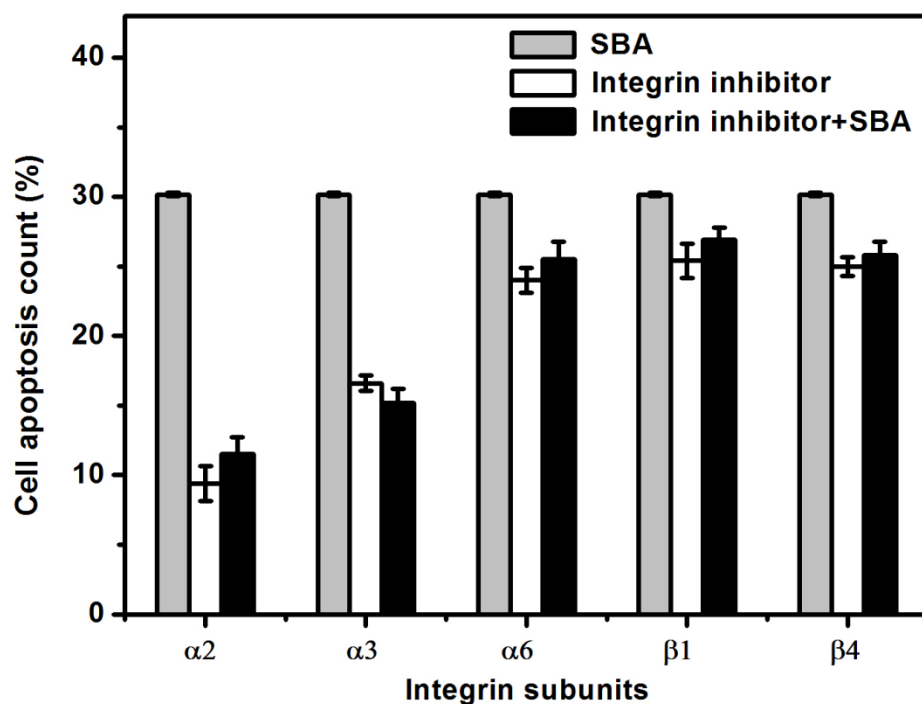

**Figure S3.** The roles of integrin inhibitors in SBA-induced cell apoptosis. IPEC-J2s were treated with 10  $\mu\text{g/mL}$  of integrin inhibitors ( $\alpha 3$ ,  $\alpha 6$ ,  $\beta 1$  or  $\beta 4$ ) or 10  $\mu\text{g/mL}$  integrin inhibitor ( $\alpha 3$ ,  $\alpha 6$ ,  $\beta 1$  or  $\beta 4$ ) + 2.0  $\text{mg/mL}$  SBA for 24 h. The apoptotic data are presented as the mean  $\pm$  SEM ( $n = 3$ ).
